# Supplementary material for: PfMAP-2 is essential for male gametogenesis in the malaria parasite Plasmodium falciparum
Source: Sci Rep. 2020 Jul 17;10:11930. doi: 10.1038/s41598-020-68717-5 (PMC7368081; doi:10.1038/s41598-020-68717-5)
Supplement: Supplementary file 3 — Supplementary file3 (XLSX 15 kb) [file 41598_2020_68717_MOESM3_ESM.xlsx]

## Sheet: GPL15130 vs GPL28317
GEO platform ID	GPL15130	GPL28317
Agilent Micorarray ID	Agilent-037237	Agilent-085039
Agilent Design Name	Pf3D7v7.1_Transcriptome_apimito	Pf3D7v7.1_Transcriptome_apimito_v2
Agilent Probe Groups	Pfalv7.1+apimito [14841 Probes (including EGFP_MUT_v7.1_P1/1)]	TV_PFALC [14840 Probes (lacking EGFP_MUT_v7.1_P1/1)]
Agilent Repeat Controls	3D7v7.1_repeat_controls [23 Probes 15x replicated (including EGFP_MUT_v7.1_P1/1)]	3D7v7.1_repeat_controls [22 Probes 15x replicated (lacking EGFP_MUT_v7.1_P1/1) ]
Agilent Control Probes	536	536
Reference Publication	Painter HJ et al., Methods Mol Biol. 2013;923:213-9.	this paper

## Sheet: new probes on GPL28317
Probes present on Agilent-085039 but absent on Agilent-037237	Probe ID	Sequence	P. falciparum codon-optimised gene sequences
gdv1_asRNA_1	CUST_1_PI437237204	CTCACAACCAGCATCATTAGTATCACTATCGTTCGTATTAAGATAAAACAAACCTTTCGT
gdv1_asRNA_2	CUST_2_PI437237204	TCGACGCCTACTATTACCTTTTACTTTCAATTTTACGCAAGTCTCTTTTTTGTAGTTCAT
gfp	CUST_22_PI437229943	CCCAACGAAAAGAGAGACCACATGGTCCTTCTTGAGTTTGTAACAGCTGCTGGGATTACA
megfp_Pf codon-optimised	CUST_1_PI437237381	TGGACATAAATTTAGTGTATCAGGAGAAGGTGAAGGAGATGCAACATATGGTAAATTGAC	TCAAAAGGTGAAGAATTATTTACAGGAGTTGTACCAATATTAGTTGAATTAGATGGTGATGTAAATGGACATAAATTTAGTGTATCAGGAGAAGGTGAAGGAGATGCAACATATGGTAAATTGACATTAAAATTTATTTGTACAACAGGAAAATTGCCAGTTCCTTGGCCAACATTAGTAACAACATTAACATATGGTGTACAATGTTTTTCAAGATATCCAGATCATATGAAACAACATGATTTCTTTAAAAGTGCAATGCCAGAAGGTTATGTTCAAGAAAGAACAATATTTTTCAAAGATGATGGAAATTATAAAACAAGAGCTGAAGTTAAATTTGAAGGTGATACATTAGTAAATAGAATAGAATTAAAAGGAATTGATTTTAAAGAAGATGGT…
mscarlet_Pf codon-optimised	CUST_1_PI437237384	CAATGGGATGGGAAGCATCAACAGAAAGATTATATCCAGAAGATGGTGTTTTAAAAGGAG	AGTAAAGGTGAAGCAGTTATAAAAGAATTTATGAGATTTAAAGTACATATGGAAGGTTCAATGAATGGACATGAATTTGAAATAGAAGGAGAAGGTGAAGGAAGACCATATGAAGGAACACAAACAGCTAAATTGAAAGTTACAAAAGGTGGACCATTACCATTTAGTTGGGATATTTTATCACCACAATTTATGTATGGTAGTAGAGCATTTACAAAACATCCAGCTGATATACCAGATTATTATAAACAATCATTTCCAGAAGGATTTAAATGGGAAAGAGTAATGAATTTTGAAGATGGAGGTGCAGTTACAGTAACACAAGATACAAGTTTAGAAGATGGTACATTAATTTATAAAGTTAAATTGAGAGGTACAAATTTTCCACCAGATGGACCA…
scdhodh	CUST_1_PI437237213	ATGGAAGCTAAGGGTTATACATCCATAGATCAGTTCCGTGGGAAGTTGAACAGCATTTAA
spcas9_1	CUST_3_PI437237207A	AGTACTTTGACACCACCATCGACCGGAAGAGGTACACCAGCACCAAAGAGGTGCTGGACG
spcas9_2	CUST_4_PI437237207A	TCAGAGAGCAGGCCGAGAATATCATCCACCTGTTTACCCTGACCAATCTGGGAGCCCCTG
spcas9_3	CUST_5_PI437237207A	ATCCTGGCCGACGCTAATCTGGACAAAGTGCTGTCCGCCTACAACAAGCACCGGGATAAG
spcas9_4	CUST_6_PI437237207A	CAGCACAAGCACTACCTGGACGAGATCATCGAGCAGATCAGCGAGTTCTCCAAGAGAGTG
spcas9_Pf codon-optimised_1	CUST_1_PI437237210	TCACAATTAGGTGGAGATAAAAGACCAGCAGCTACTAAAAAAGCAGGTCAAGCTAAAAAG	ATGGCACCTAAAAAGAAAAGAAAAGTAGGAATACATGGTGTACCAGCAGCTGATAAAAAATATTCTATAGGATTAGATATAGGTACAAATTCAGTAGGTTGGGCAGTTATAACAGATGAATATAAAGTACCTAGTAAAAAATTTAAAGTTTTAGGAAATACAGATAGACATTCAATTAAAAAGAATTTAATAGGAGCATTATTATTTGATAGTGGAGAAACAGCAGAAGCAACAAGATTAAAAAGAACTGCTAGAAGAAGATATACTAGAAGAAAAAATAGAATATGTTATTTACAAGAAATATTTAGTAATGAAATGGCTAAAGTTGATGATTCATTTTTCCATAGATTAGAAGAATCATTTTTAGTAGAAGAAGATAAAAAACATGAAAGACATCCA…
spcas9_Pf codon-optimised_2	CUST_3_PI437237210	TTAGATGCAACTTTAATACATCAAAGTATAACAGGTTTATATGAAACTAGAATAGATTTA
spcas9_Pf codon-optimised_3	CUST_4_PI437237210	GCTTTTAAATATTTTGATACTACAATAGATAGAAAAAGATATACATCAACTAAAGAAGTA
spcas9_Pf codon-optimised_4	CUST_5_PI437237210	AGAGAACAAGCAGAAAATATAATTCATTTATTTACTTTAACAAATTTAGGTGCTCCTGCA
tdtomato	CUST_1_PI437237462	ACACCAAGCTGGACATCACCTCCCACAACGAGGACTACACCATCGTGGAACAGTACGAGC
tdtomato_Pf codon-optimised_1	CUST_1_PI437238109	GAACAATATGAGAGATCTGAAGGGCGTCATCATTTGTTTCTTTATGGTATGGATGAATTA	ATGGTTAGTAAAGGAGAAGAAGTAATAAAAGAATTTATGAGATTTAAGGTACGAATGGAAGGATCAATGAATGGACATGAGTTTGAAATTGAAGGAGAAGGAGAAGGTAGACCTTATGAAGGTACGCAAACGGCTAAATTGAAAGTAACAAAAGGAGGTCCATTACCCTTTGCATGGGATATATTAAGTCCACAATTTATGTATGGAAGTAAAGCATATGTAAAACATCCAGCTGATATACCTGATTACAAGAAGTTGAGTTTTCCAGAGGGTTTTAAATGGGAACGTGTTATGAATTTTGAGGATGGAGGTTTAGTAACAGTTACACAAGATTCTAGTTTACAAGACGGGACTCTTATATATAAAGTGAAAATGAGAGGAACTAATTTTCCTCCTGAT…
tdtomato_Pf codon-optimised_2	CUST_2_PI437238109	GGATGGTGTGTTAAAAGGTGAAATTCATCAAGCTTTGAAATTAAAAGATGGAGGTCACTA
yfcu_Pf codon-optimised_1	CUST_1_PI437237216	GCAGCTTTTCCAGAAGTTAGAATAGTAACAGGAGCATTAGATAGAGGTTTAGATGAAAAT	ATGGTTACAGGTGGAATGGCAAGTAAATGGGATCAAAAAGGAATGGATATTGCTTATGAAGAAGCAGCTTTAGGTTATAAAGAAGGTGGCGTACCAATAGGTGGATGTTTAATAAATAATAAAGATGGATCAGTATTAGGAAGAGGTCATAATATGAGATTTCAAAAAGGAAGTGCAACATTACATGGTGAAATTTCAACATTAGAAAATTGTGGAAGATTAGAAGGAAAAGTTTATAAAGATACAACATTATATACAACATTAAGTCCATGTGATATGTGTACAGGAGCTATTATAATGTATGGTATACCAAGATGTGTTGTAGGTGAAAATGTAAATTTTAAATCAAAAGGTGAAAAATATTTACAAACAAGAGGTCATGAAGTTGTAGTTGTAGAT…
yfcu_Pf codon-optimised_2	CUST_6_PI437237216	CCAGAAAG+A9:C28AATTTATTTCTTAAATTTAATATGTAGTAAAGAAGGTATAGAAAAATATCAT
Probes present on Agilent-037237 but absent on Agilent-085039	Probe ID	Sequence
egfp	EGFP_MUT_v7.1_P1/1	CATTGTGTGAGTTATAGTTGTATTCCAATTTGTGTCCAAGAATGTTTCCATCTTCTTTAA
